# Supplementary material for: Identification and Validation of ERK5 as a DNA Damage Modulating Drug Target in Glioblastoma
Source: MDPI journal article supplement (doi:10.3390/cancers13050944), 2021-02-24
Supplement: s1 [file s1]

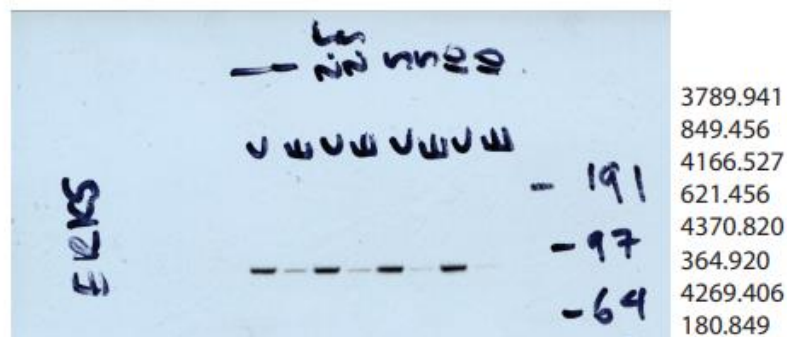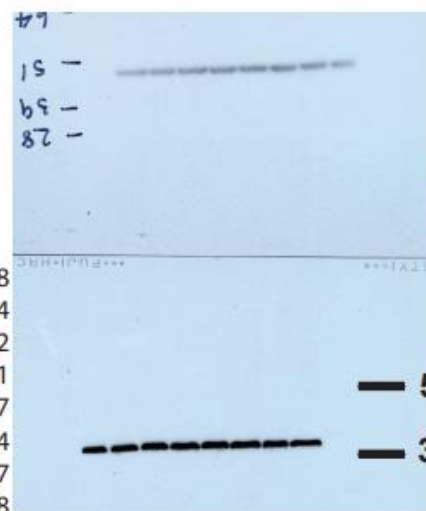

Figure S1B (ERK5 and actin)

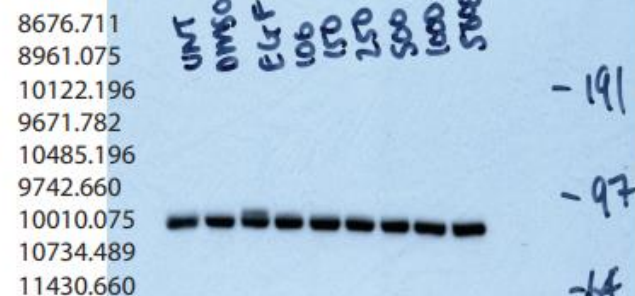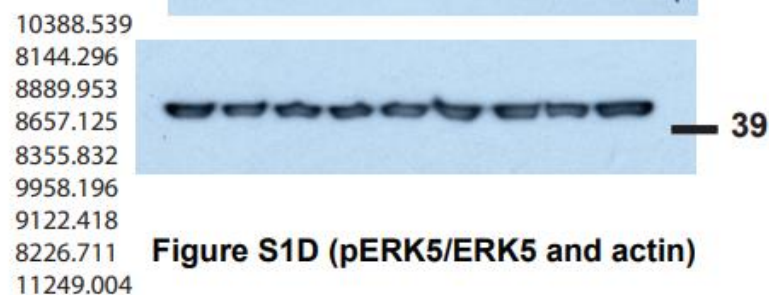

Figure S1D (pERK5/ERK5 and actin)

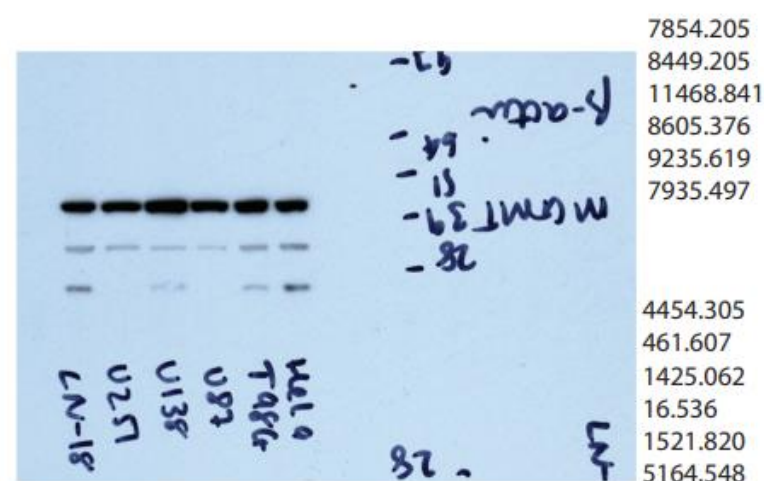

Figure S1C (MGMT and actin)

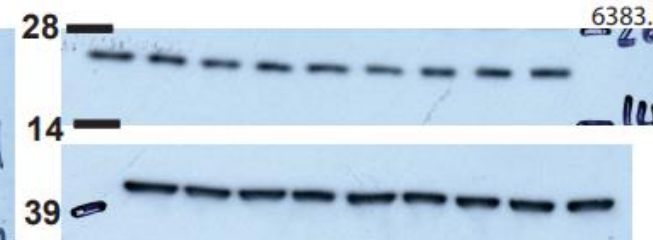

Figure S2B (MGMT and actin)

Gel images and densitometry  
quantification for (Carmell et al)
